# Supplementary material for: MnO2 coated nanotheranostic LDH for synergistic cascade chemo/chemodynamic cancer therapy under the guidance of MRI-targeted diagnosis
Source: Royal Society of Chemistry journal article supplement (doi:10.1039/d1bm01806j), 2022-01-01
Supplement: d1bm01806j1.pdf [file d1bm01806j1.pdf]

## Electronic Supplementary Information

# **MnO<sub>2</sub> Coated Nanotheranostic LDH for Synergistic Cascade Chemo/Chemodynamic Cancer Therapy under the Guidance of MRI-Targeted Diagnosis**

Bengao Zhu,<sup>a</sup> Xuefei Lv,<sup>b</sup> Mengmeng Zhang,<sup>a</sup> Huiying Wang,<sup>a</sup> Senbin Chen,<sup>\*a</sup> Jintao Zhu<sup>\*a</sup>

\* Corresponding authors

<sup>a</sup>: State Key Laboratory of Materials Processing and Mold Technology, and Key Laboratory of Materials Chemistry for Energy Conversion and Storage of Ministry of Education (HUST), School of Chemistry and Chemical Engineering, Huazhong University of Science and Technology (HUST), Wuhan 430074, Hubei, PR China

**Email:** jtzhu@mail.hust.edu.cn (J. Z.), senbin@hust.edu.cn (S. C.)

<sup>b</sup>: Radiology department, Wuhan Red Cross Hospital, Wuhan 430074, Hubei, PR China

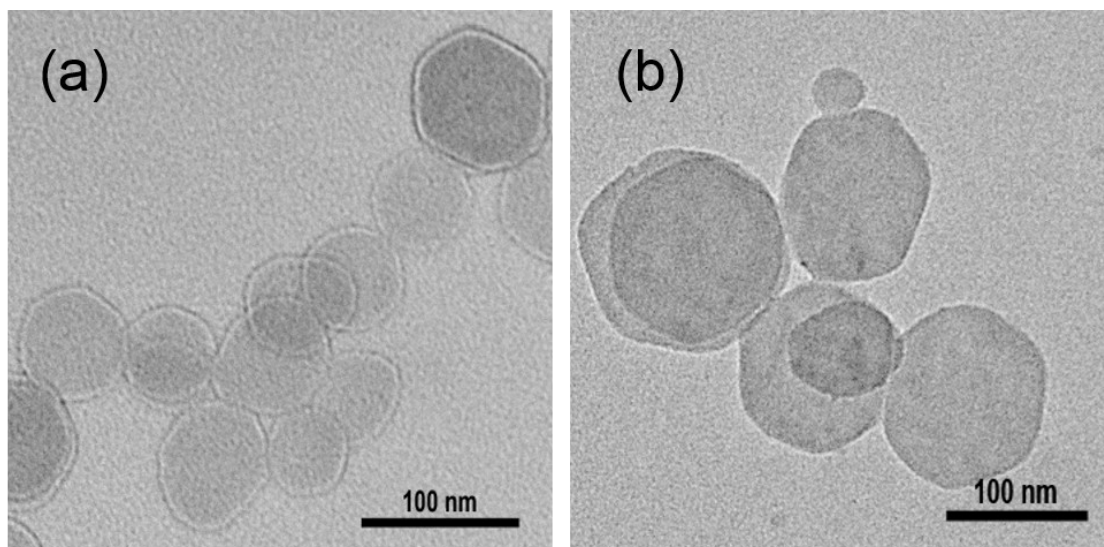

**Figure S1.** TEM images of LDH (a), LDH/5-FU (b).

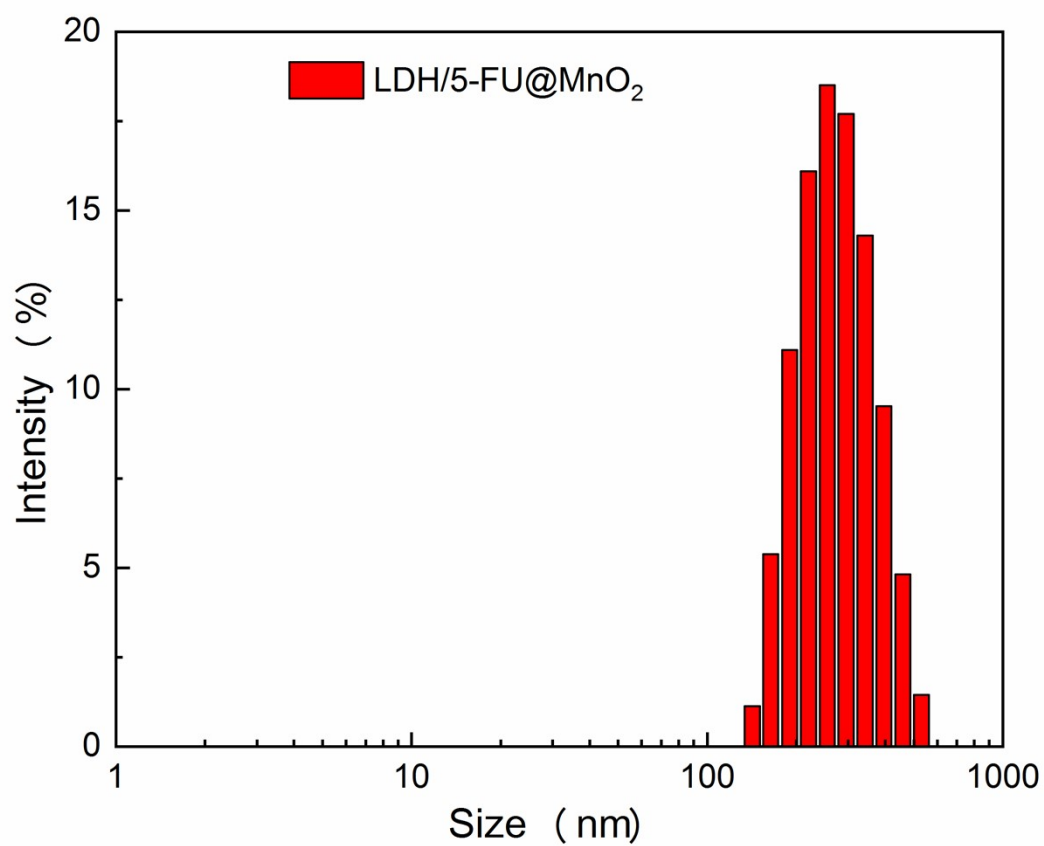

Figure S2. DLS histograms of LDH/5-FU@MnO<sub>2</sub>, c = 250 µg/mL.

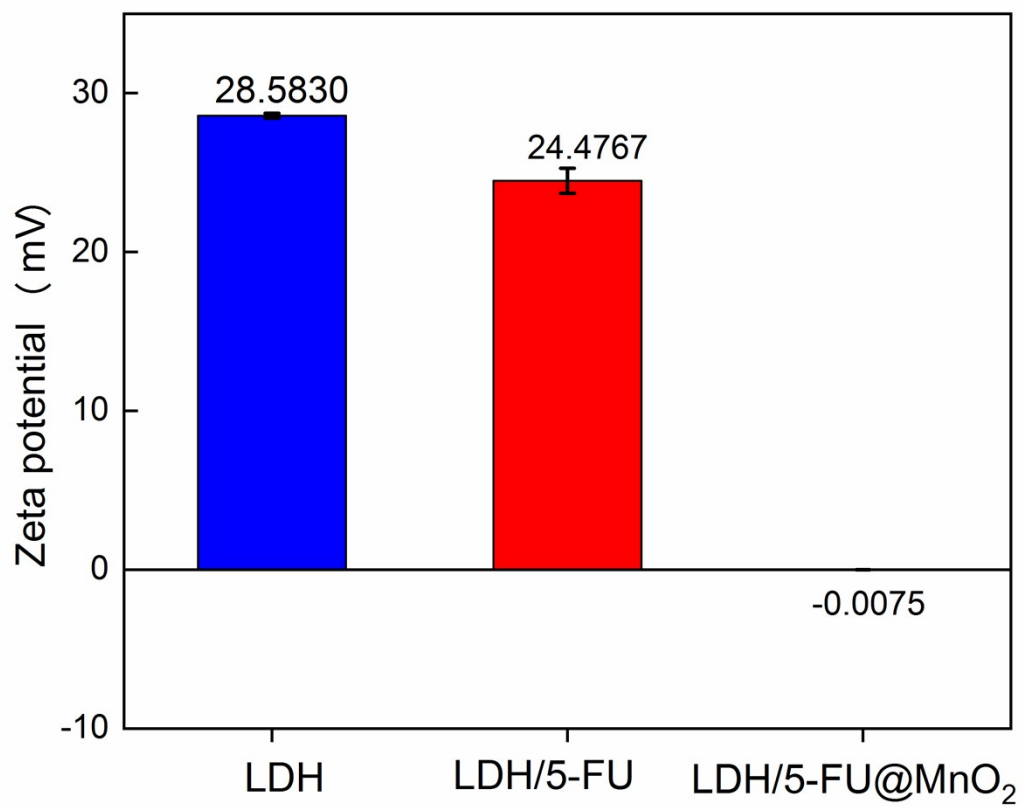

**Figure S3.** Zeta potential of LDH, LDH/5-FU, LDH/5-FU@MnO<sub>2</sub>.

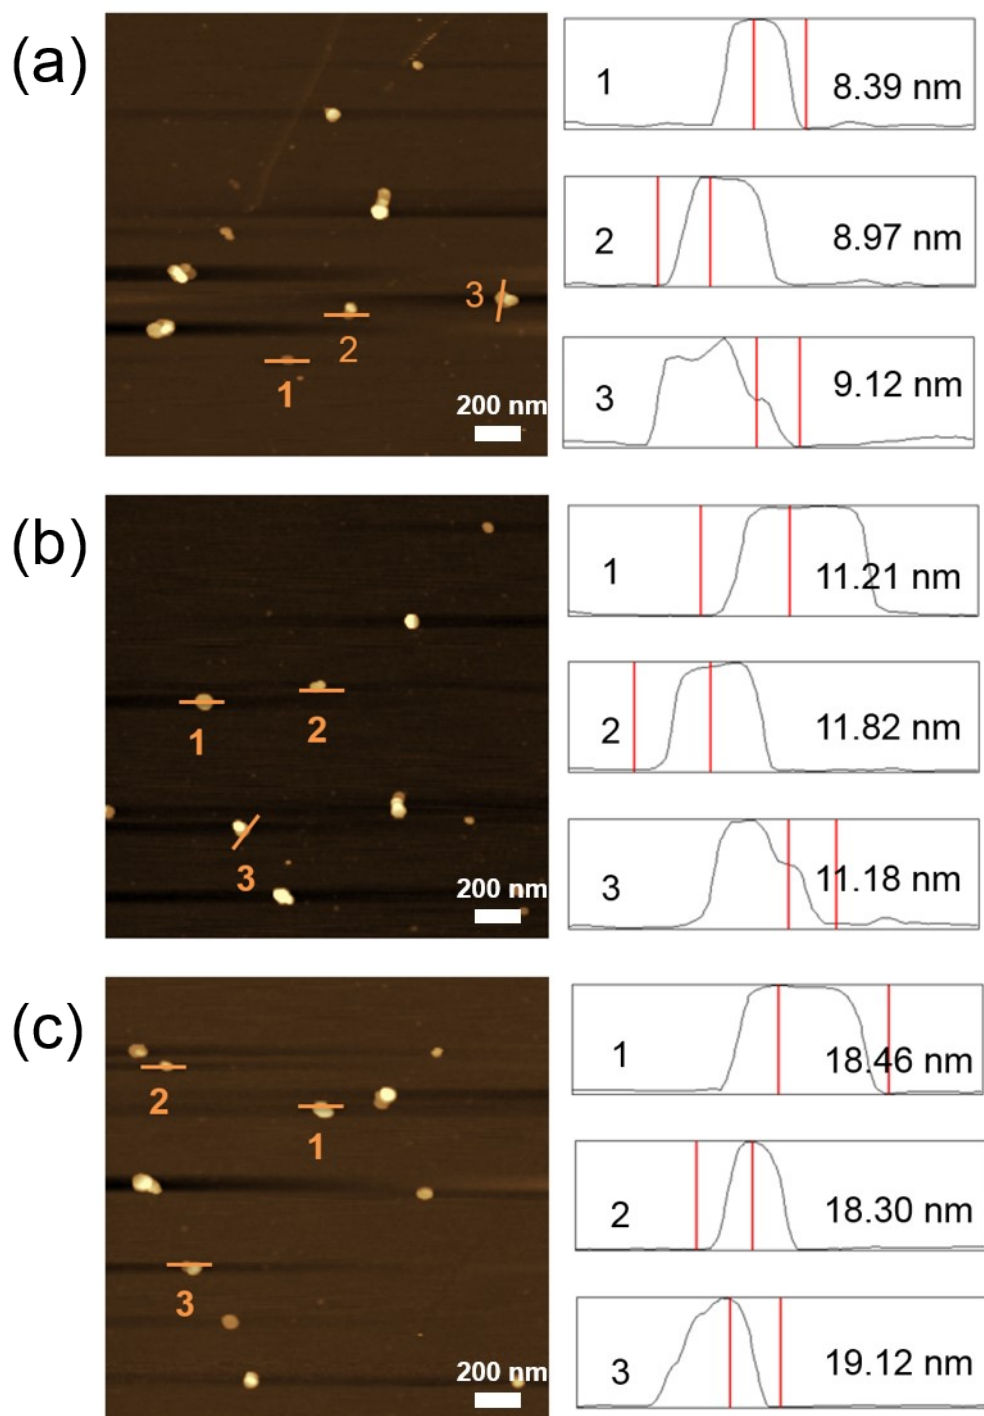

**Figure S4.** The height image of AFM of LDH (a) LDH/5-FU (b) LDH/5-FU@MnO<sub>2</sub>(c).

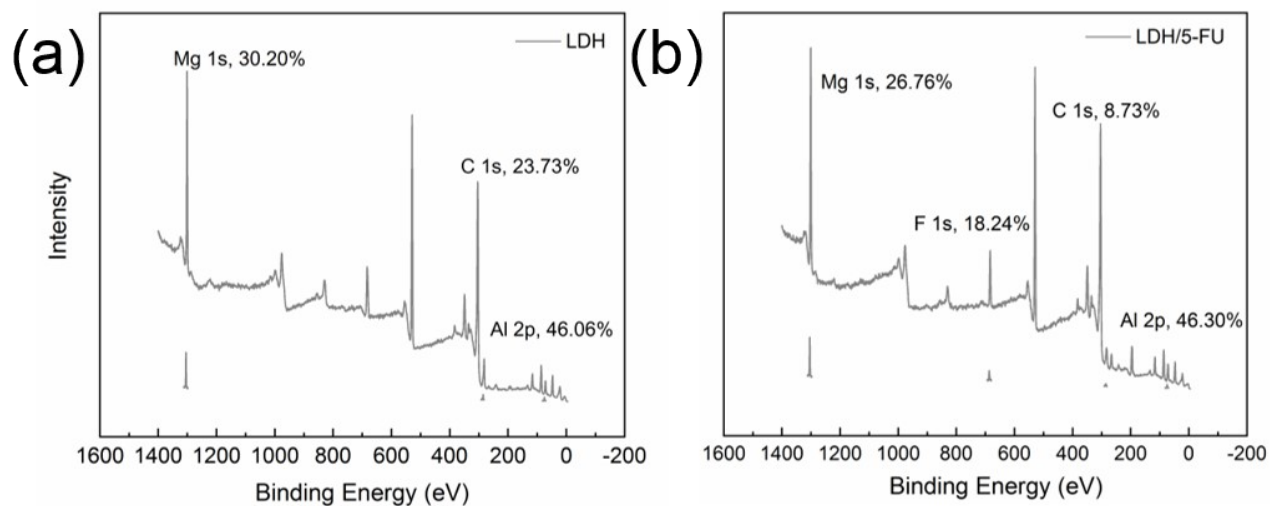

Figure S5. XPS spectra of LDH (a) LDH/5-FU (b).

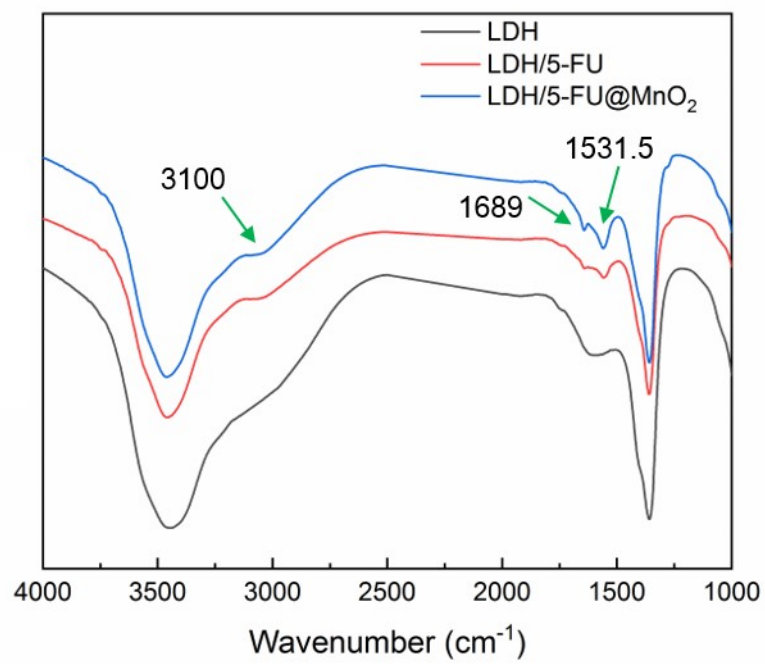

**Figure S6.** The ART-IR spectrum of LDH, LDH/5-FU, LDH/5-FU@MnO<sub>2</sub>, respectively.

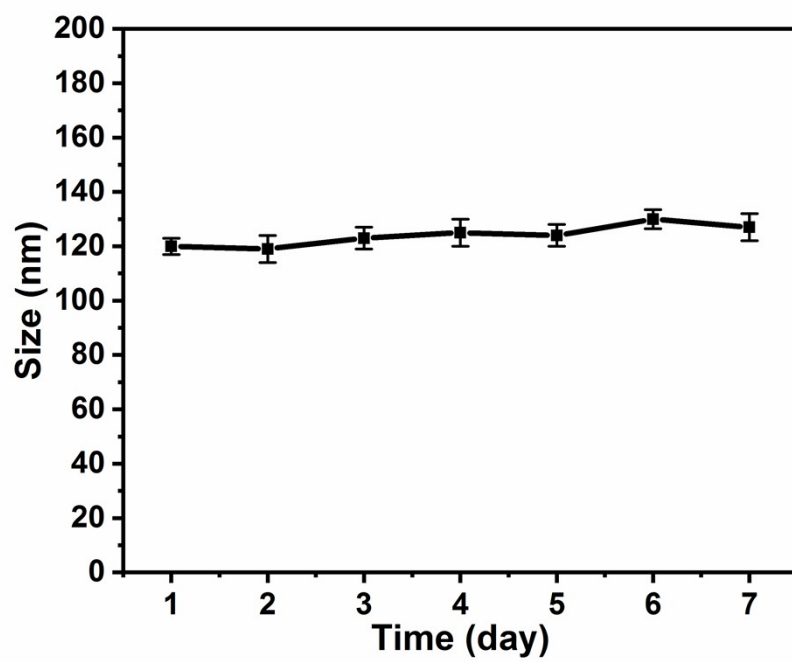

Figure S7. The size stability of LDH/5-FU@MnO<sub>2</sub> in PBS with pH 7.4 for one week.



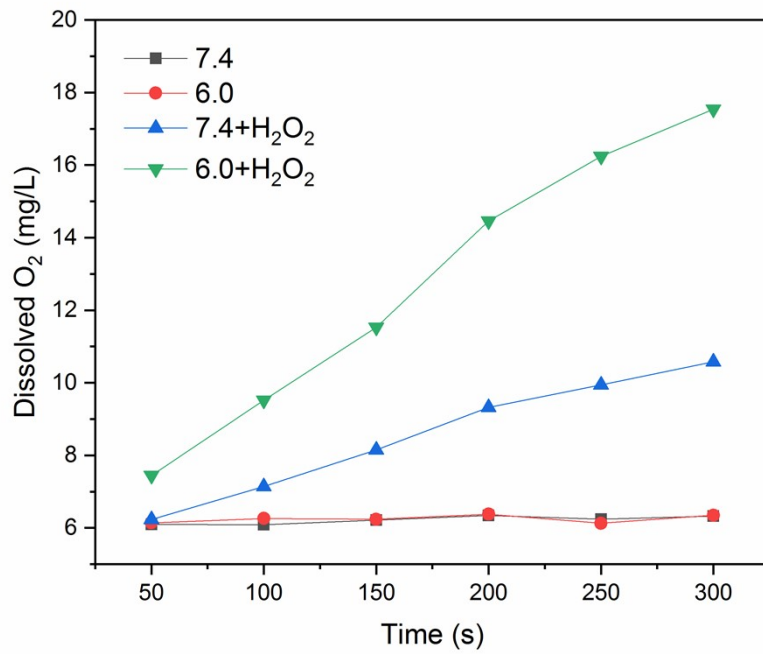

**Figure S8.** Simultaneous O<sub>2</sub> generation after incubated with PBS solution of pH = 7.4 and 6.0, containing different concentrations of H<sub>2</sub>O<sub>2</sub> (0 and 100 × 10<sup>-3</sup> mM).

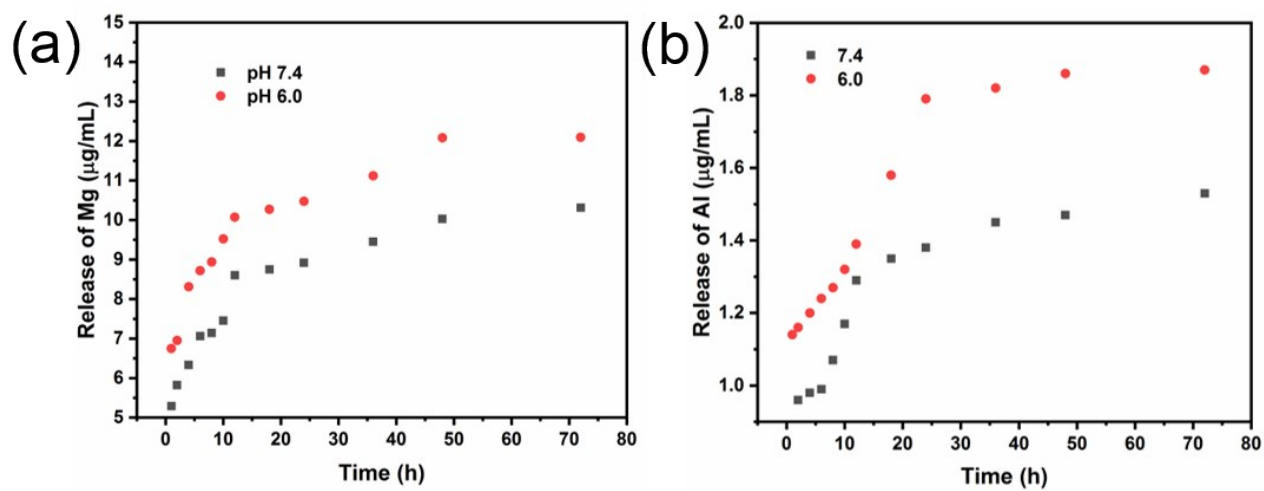

Figure S9. Release profiles of Mg (a) and Al (b) ions from LDH/5-FU@MnO<sub>2</sub> in different pH buffers.

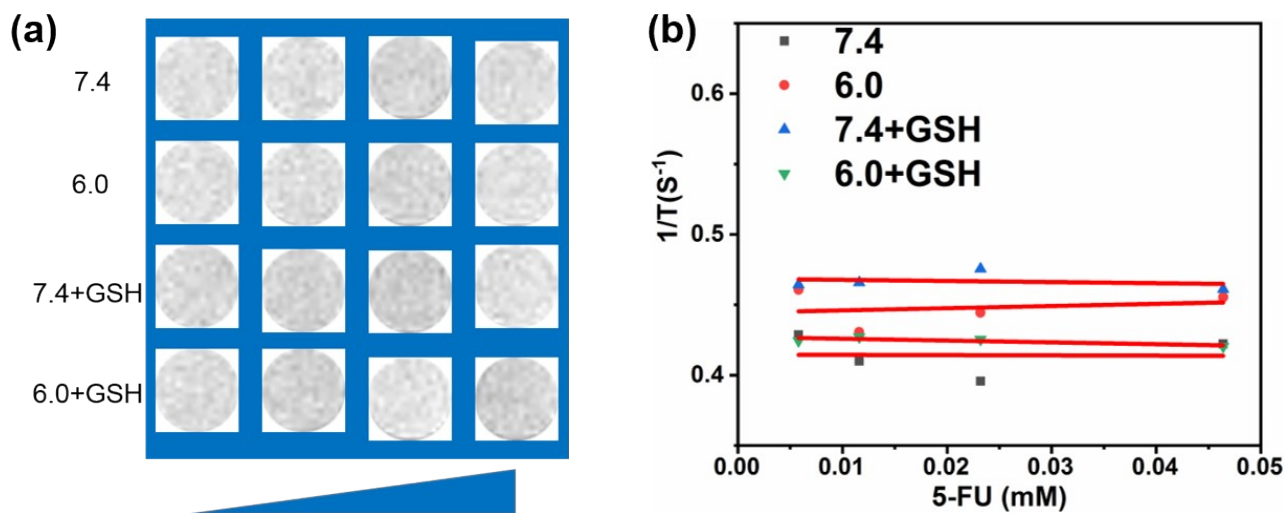

**Figure S10.** *In vitro* T<sub>1</sub>-weighted MRI images (a) of LDH/5-FU when incubated with PBS solution of pH = 7.4 and 6.0, containing different concentrations of GSH (0 and 10 mM) and corresponding relaxation rate r<sub>1</sub> (b).

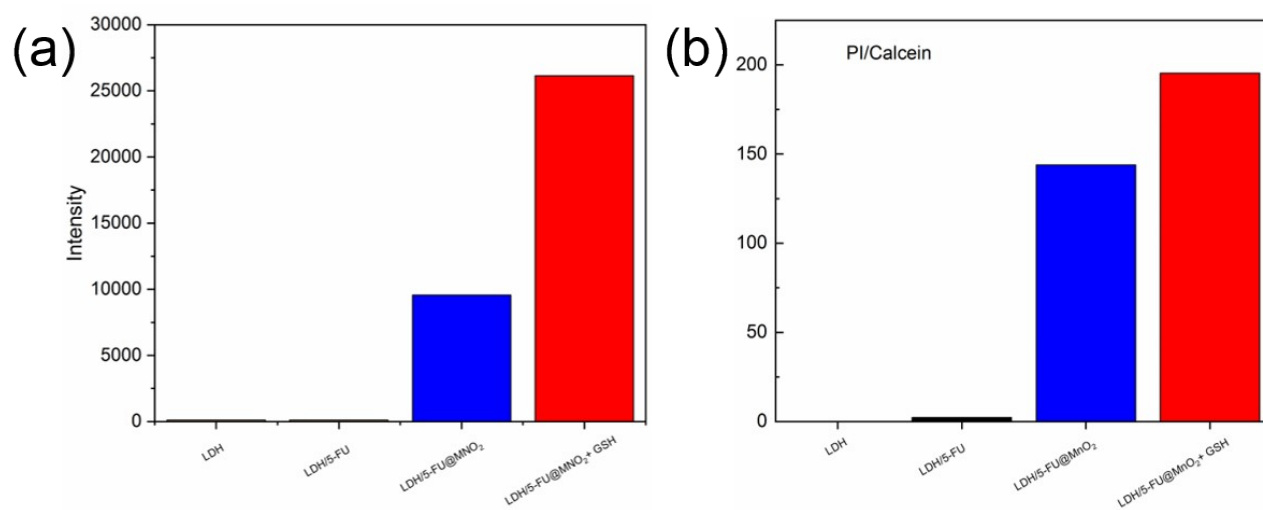

**Figure S11.** Quantificational analysis of ROS level (a) and the ratio of PI/Calcein (b) of tumor cell with different groups.

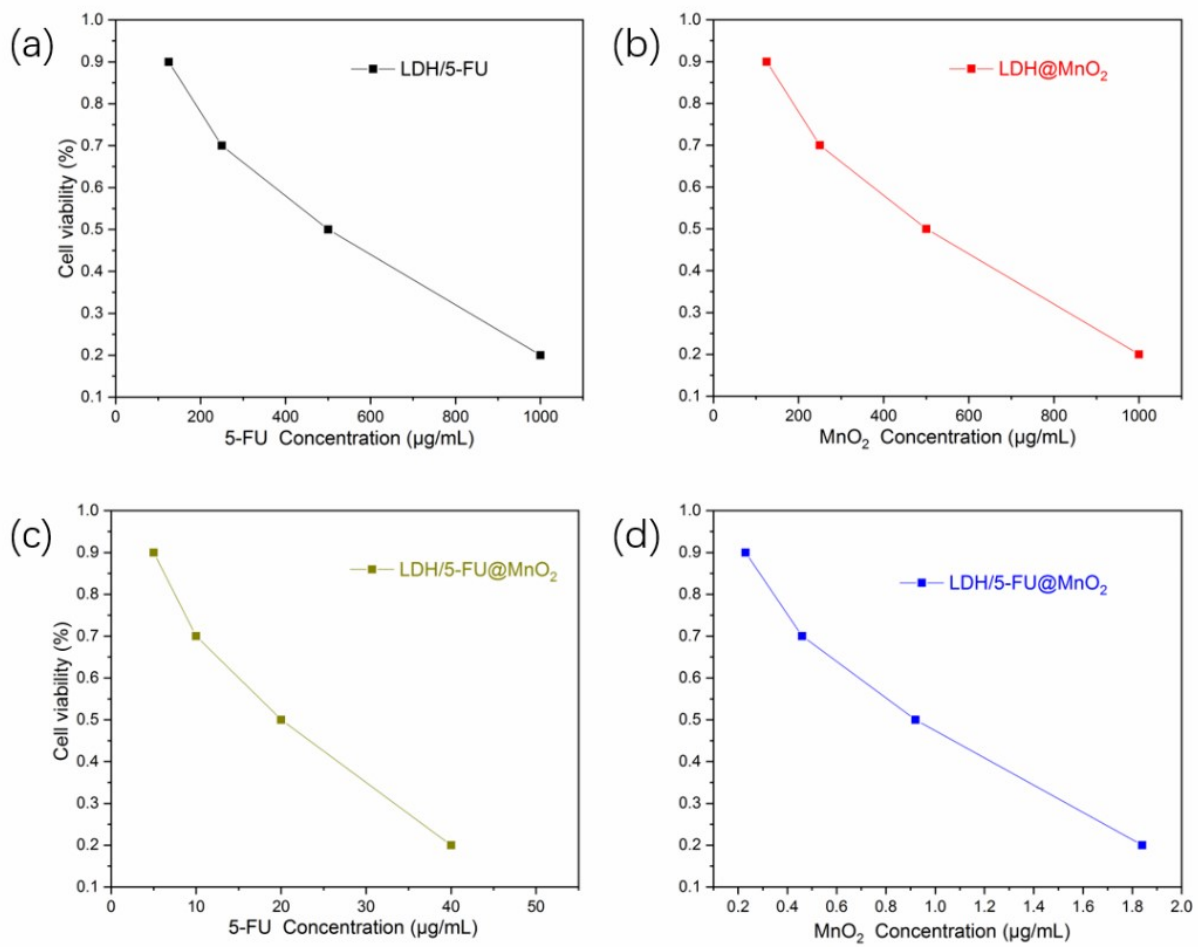

**Figure S12.** Cell survival rates treated with LDH/5-FU, LDH@MnO<sub>2</sub> or LDH/5-FU@MnO<sub>2</sub> at different concentrations.

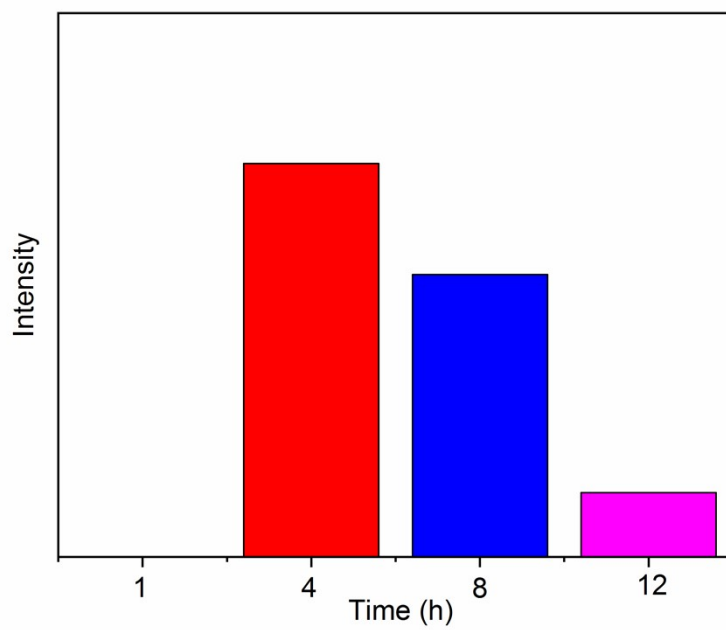

**Figure S13.** Quantificational analysis of T1-weighted images of LDH/5-FU@MnO<sub>2</sub> in vivo with different time.

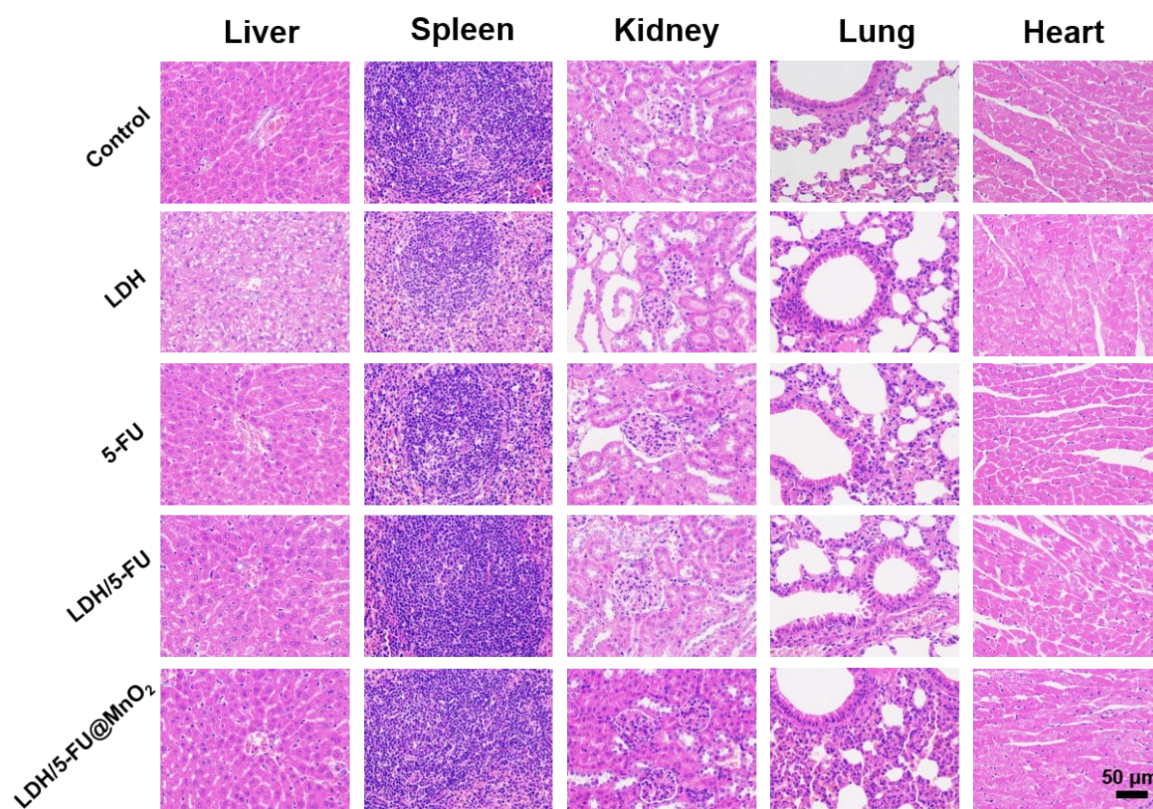

**Figure S14.** Representative H&E stained sections of liver, spleen, kidney, lung and heart from mice treated with PBS, LDH, 5-FU, LDH/5-FU or LDH/5-FU@MnO<sub>2</sub>. The scale bar in the last image applies to the others.

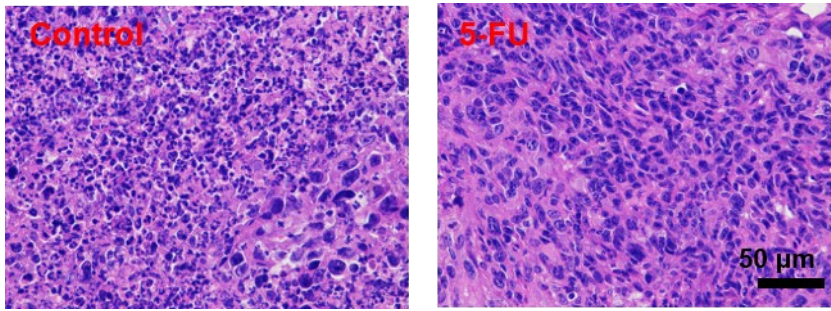

**Figure S15.** H&E stained images of tumor tissues at 17 days Control, 5-FU treatments.
